# Supplementary material for: Evaluation of LandscapeDNDC Model Predictions of CO2 and N2O Fluxes from an Oak Forest in SE England
Source: MDPI journal article supplement (doi:10.3390/f12111517), 2021-11-03
Supplement: s1 [file s1]

Article

# Evaluation of LandscapeDNDC Model Predictions of CO<sub>2</sub> and N<sub>2</sub>O Fluxes from an Oak Forest in SE England with and without Considering Stand Structure.

Shirley M. Cade<sup>1</sup>, Kevin C. Clemitshaw<sup>1</sup>, Saúl Molina-Herrera<sup>2</sup>, Rüdiger Grote<sup>2</sup>, Edwin Haas<sup>2</sup>, Matthew Wilkinson<sup>3</sup>, James I. L. Morison<sup>3</sup> and Sirwan Yamulki<sup>3\*</sup>

## Supplementary Information.

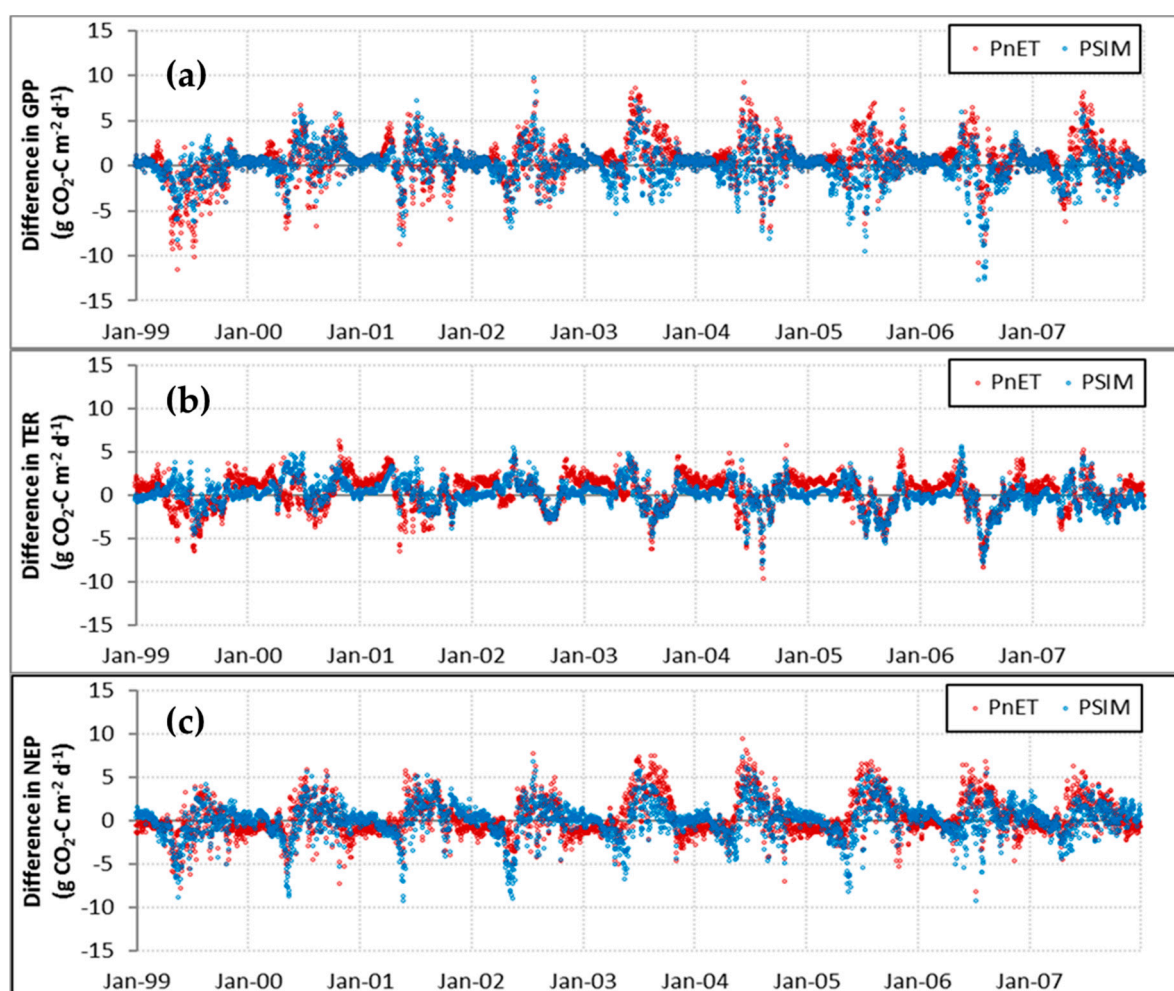

**Figure S1.** Daily residual values (measured – simulated) for: a) GPP, b) TER and c) NEP at the Straits Inclosure, modelled with PnET (red circles) and PSIM (blue circles) modules 1999–2007.

**Table S1.** Sensitivity test results showing % change in simulated annual total GHG fluxes averaged over 1999–2007 for a) input variable changes simulated with PnET (see Tables 1 and 2 for initial input values), b) parameter value changes simulated with PnET and c) parameter value changes simulated with PSIM. Parameter value units are given in Table 3. Changes >10% shaded.

(a)

| Input variable              | GPP % change |      | TER % change |      | NEP % change |      | Soil CO <sub>2</sub> % change |      | N <sub>2</sub> O % change |       | NO % change |       |
|-----------------------------|--------------|------|--------------|------|--------------|------|-------------------------------|------|---------------------------|-------|-------------|-------|
|                             | +10%         | -10% | +10%         | -10% | +10%         | -10% | +10%                          | -10% | +10%                      | -10%  | +10%        | -10%  |
| Soil pH (±1 pH unit)        | -1.1         | 0.8  | -0.8         | 0.6  | -2.3         | 1.1  | -0.3                          | 0.6  | -5.3                      | -1.0  | -2.7        | 661   |
| Clay (±10%)                 | -0.4         | 0.0  | -0.4         | 0.2  | -0.5         | -0.7 | -0.2                          | 0.5  | -1.2                      | -0.6  | 1.1         | 1.6   |
| Organic C (±10%)            | 2.1          | -2.8 | 2.2          | -2.8 | 1.6          | -3.0 | 2.6                           | -3.1 | 6.4                       | -8.7  | 21.6        | -22.0 |
| Organic N (±10%)            | -1.2         | 0.7  | -1.2         | 0.9  | -1.4         | 0.0  | -1.0                          | 1.3  | -3.1                      | 1.3   | -5.6        | 4.5   |
| Bulk density (±10%)         | 1.5          | -0.3 | 1.7          | -0.4 | 0.9          | -0.2 | 1.9                           | -0.5 | 12.4                      | -6.7  | 39.3        | -22.6 |
| Field capacity (±10%)       | -1.3         | 0.9  | -1.8         | 1.7  | 0.0          | -1.6 | -1.9                          | 2.1  | 5.9                       | -4.5  | 16.2        | -8.5  |
| Wilting point (±10%)        | -0.1         | 0.1  | 0.3          | -0.1 | -1.1         | 0.5  | 0.3                           | 0.2  | 0.4                       | -0.3  | 1.5         | -1.2  |
| Hydraulic conductivity /10  |              | -0.6 |              | -0.6 |              | -0.5 |                               | -0.6 |                           | 1.4   |             | 1.5   |
| Hydraulic conductivity x10  | -0.2         |      | -0.1         |      | -0.5         |      | 0.0                           |      | -3.2                      |       | -0.1        |       |
| Hydraulic conductivity x100 | -0.2         |      | 0.0          |      | -0.9         |      | -0.2                          |      | -4.8                      |       | -0.5        |       |
| N deposition (±10%)         | 0.1          | -1.3 | 0.0          | -1.1 | 0.5          | -2.1 | -0.2                          | -1.0 | 0.4                       | -3.8  | 1.9         | -2.9  |
| N deposition (+100, -50%)   | 7.0          | -5.3 | 5.7          | 4.5  | 11.7         | -8.2 | 4.7                           | -3.9 | 17.7                      | -14.1 | 24.8        | -15.4 |
| Temperature* (±10%)         | 3.2          | -1.5 | 2.8          | 0.3  | 4.8          | -7.8 | -3.9                          | 6.9  | -1.9                      | 8.0   | -6.3        | 15.0  |
| Precipitation (±10%)        | -1.5         | -0.8 | -3.3         | -2.1 | 4.6          | 3.4  | -6.7                          | -5.8 | -3.7                      | -5.6  | -3.1        | -4.2  |

\* = min., max and mean

(b)

| PnET Parameter                     | GPP % change |      | TER % change |      | NEP % change |      | Soil CO <sub>2</sub> % change |       | N <sub>2</sub> O % change |       | NO % change |       |
|------------------------------------|--------------|------|--------------|------|--------------|------|-------------------------------|-------|---------------------------|-------|-------------|-------|
|                                    | +10%         | -10% | +10%         | -10% | +10%         | -10% | +10%                          | -10%  | +10%                      | -10%  | +10%        | -10%  |
| BASEFOLRESPFRAC (0.165, 0.135)     | 3.5          | -4.0 | 5.1          | -5.5 | -1.8         | 1.4  | 0.7                           | -0.6  | 5.1                       | -6.1  | 1.0         | -3.6  |
| MFOLOPT (0.517, 0.423)             | 7.6          | -7.8 | 9.1          | -8.9 | 2.3          | -4.1 | 6.7                           | -6.1  | 4.4                       | -0.8  | 5.7         | -6.8  |
| RESPQ10 (2.2, 1.8)                 | -2.4         | 3.0  | -3.6         | 4.7  | 1.6          | -3.0 | 1.1                           | -0.5  | -6.5                      | 5.2   | -3.6        | 2.4   |
| ROOTMRESPFRAC (2.2, 1.8)           | 0.7          | -1.0 | 1.5          | -1.4 | -1.6         | 0.5  | 2.9                           | -2.3  | 3.6                       | -3.2  | 0.3         | -1.4  |
| EXT (0.44, 0.36)                   | 0.4          | -1.4 | 2.0          | -2.7 | -5.3         | 3.0  | 0.6                           | -1.0  | 7.6                       | -8.7  | 3.5         | -5.6  |
| NCFLOPT (0.0264, 0.0216)           | 0.4          | -2.4 | 0.5          | -1.9 | 0.2          | -4.4 | 0.3                           | -1.1  | -4.5                      | 3.3   | -3.0        | 0.6   |
| EXPL_NH4 (0.33, 0.270)             | -0.6         | -0.5 | -0.5         | -0.3 | -0.5         | -0.9 | -0.5                          | -0.3  | -0.2                      | 2.1   | -2.2        | 0.2   |
| EXPL_NO3 (0.176, 0.144)            | -0.2         | -0.5 | -0.1         | -0.3 | -0.2         | -1.4 | 0.0                           | 0.0   | -2.0                      | 3.4   | -3.5        | 1.2   |
| SENECSTART (330, 270) <sup>1</sup> | -12.6        | -4.9 | -14.9        | -5.3 | -4.8         | -3.4 | -11.4                         | -2.7  | 0.4                       | -3.2  | -13.5       | -3.7  |
| GDDFOLSTART (550, 450)             | -2.9         | 2.5  | -3.9         | 3.7  | 0.2          | -1.4 | -5.9                          | 5.9   | -4.2                      | 1.6   | -2.8        | 2.3   |
| GDDFOLEND (1210, 990)              | 5.8          | -6.0 | 9.9          | -8.9 | -8.0         | 3.7  | 17.0                          | -13.2 | 19.3                      | -14.9 | 11.8        | -11.5 |

<sup>1</sup> = SENECSSTART ± 30 days

(c)

| PSIM parameter                    | GPP % change |      | TER % change |      | (c)NEP % change |       | Soil CO <sub>2</sub> % change |      | N <sub>2</sub> O % change |      | NO % change |       |
|-----------------------------------|--------------|------|--------------|------|-----------------|-------|-------------------------------|------|---------------------------|------|-------------|-------|
|                                   | +10%         | -10% | +10%         | -10% | +10%            | -10%  | +10%                          | -10% | +10%                      | -10% | +10%        | -10%  |
| MFOLOPT (0.517, 0.423)            | 1.9          | -0.9 | 2.8          | -1.5 | 0.8             | 1.2   | 3.2                           | -1.3 | 3.9                       | -4.8 | 1.1         | -4.7  |
| NCFOLOPT (0.0264, 0.0216)         | 0.0          | -0.1 | 0.2          | -0.3 | -0.6            | 0.4   | -0.2                          | 0.4  | -1.7                      | -0.9 | -2.6        | -2.6  |
| GDDFOLSTART (550, 450)            | -1.8         | 1.5  | -0.8         | 0.7  | -4.9            | 3.9   | -0.1                          | 0.2  | -1.7                      | 0.5  | -2.9        | 1.0   |
| NDFLUSH (49.5, 40.5)              | -1.2         | 1.7  | -0.6         | 0.8  | -2.9            | 3.7   | -0.2                          | 0.3  | -0.9                      | 0.6  | -2.0        | 1.1   |
| DLEAFSHED (340, 320) <sup>1</sup> | 1.9          | -2.0 | 1.4          | -1.3 | 3.3             | -4.1  | 1.1                           | -0.7 | 2.5                       | -2.9 | 5.0         | -4.7  |
| DLEAFSHED (350, 300) <sup>2</sup> | 3.7          | -4.5 | 3.0          | -2.3 | 6.0             | -11.7 | 2.2                           | 0.4  | 5.1                       | -8.9 | 9.6         | -12.8 |
| NDMORTA (110, 90)                 | -0.7         | 0.7  | -0.5         | 0.6  | -1.2            | 1.2   | -0.4                          | 0.5  | -1.8                      | 5.8  | -2.4        | 1.9   |
| Canopy VCMAX25 (99, 81)           | 3.8          | -4.2 | 2.1          | -2.4 | 8.9             | -9.9  | 1.3                           | -1.4 | -1.8                      | 1.7  | -2.9        | 2.3   |
| KM20 (0.33, 0.27)                 | 0.1          | -0.1 | 0.8          | -0.8 | -2.1            | 2.1   | 0.3                           | -0.3 | 0.5                       | -1.0 | 0.7         | -1.5  |
| EXT (0.44, 0.26)                  | -2.4         | 2.8  | -2.4         | 2.9  | -2.5            | 2.5   | -2.6                          | 3.5  | 2.3                       | -2.0 | 2.5         | -3.3  |
| Understorey VCMAX25 (93.5, 76.5)  | 0.2          | -0.3 | 0.1          | -0.3 | 0.4             | -0.4  | 0.2                           | -0.3 | -0.7                      | 0.6  | -0.8        | 0.8   |
| No understorey                    | -17.4        |      | -20.7        |      | -7.0            |       | -21.7                         |      | -13.8                     |      | -4.4        |       |

1=DLEAFSHED ± 10 days 2 = DLEAFSHED ± 20 days
